# Supplementary material for: Trypanosomes of the Trypanosoma theileri Group: Phylogeny and New Potential Vectors
Source: MDPI journal article supplement (doi:10.3390/microorganisms10020294), 2022-01-26
Supplement: s1 [file s1]

**Table S2.** Results of sheep keds screening for trypanosomes. A positive locality has bold numbers. a/b: a–positive pools for *T. theileri*, b–number of tested specimens.

| Site             | Total              |
|------------------|--------------------|
| Vlkov            | <b>3/4</b>         |
| Ratíškovice      | 0/2                |
| <b>Hořice</b>    | <b>53/79</b>       |
| Statenice        | 0/85               |
| Přerov Předmostí | 0/13               |
| Valašská Senice  | 0/1                |
| <b>Total</b>     | <b>2/6 (33,3%)</b> |
