# Supplementary material for: Trypanosomes of the Trypanosoma theileri Group: Phylogeny and New Potential Vectors
Source: MDPI journal article supplement (doi:10.3390/microorganisms10020294), 2022-01-26
Supplement: s1 [file s1]

**Table S3.** Infection rates of *Culex* mosquitoes kept in different temperature after feeding.

| Strain                          | Mosquito Species            | Temperature (°C) | Total of Positive/Total of Dissected Mosquitoes |
|---------------------------------|-----------------------------|------------------|-------------------------------------------------|
| CUL59 (ex <i>Cs. annulata</i> ) | <i>Cx. quinquefasciatus</i> | 15               | <b>2/15</b>                                     |
|                                 |                             | 21               | 0/33                                            |
| CUL46 (ex <i>Cs. annulata</i> ) | <i>Cx. quinquefasciatus</i> | 8-11             | <b>10/52</b>                                    |
|                                 |                             | 8-11→15          | <b>1/14</b>                                     |
|                                 |                             | 15               | 0/54                                            |
|                                 |                             | 21               | 0/30                                            |
|                                 | <i>Cx. molestus</i>         | 8-11             | <b>6/29</b>                                     |
|                                 |                             | 8-11→15          | 0/6                                             |
|                                 |                             | 15               | <b>3/18</b>                                     |
|                                 |                             | 21               | 0/32                                            |
