# Supplementary material for: Trypanosomes of the Trypanosoma theileri Group: Phylogeny and New Potential Vectors
Source: MDPI journal article supplement (doi:10.3390/microorganisms10020294), 2022-01-26
Supplement: s1 [file s1]

**Table S1.** Results of deer keds screening for trypanosomes. LC – *Lipoptena cervi*, LF – *L. fortisetosa*, L. sp. – *Lipoptena* sp., a/b/c: a–positive pools for *T. theileri*, b–tested pools, c–number of tested specimens. Trypanosome positive findings have bold numbers.

| Site/Species       | Fallow Deer |        |        | Roe Deer |                 | Red Deer |                |        | Total           |
|--------------------|-------------|--------|--------|----------|-----------------|----------|----------------|--------|-----------------|
|                    | LC          | LF     | L. sp. | LC       | LF              | LC       | LF             | L. sp. |                 |
| Blíževedly         | -           | -      | -      | 0/4/4    | 0/4/5           | -        | -              | -      | 0/4/5           |
| Boršov nad Vltavou | 0/2/2       | 0/1/5  | -      | -        | 0/5/25          | -        | -              | -      | 0/12/36         |
| <b>Bystřice</b>    | -           | -      | -      | 0/4/4    | <b>1/24/110</b> | -        | -              | -      | <b>1/29/114</b> |
| Hvězda             | -           | -      | -      | -        | 0/3/3           | -        | -              | -      | 0/3/3           |
| Litice             | 0/2/2       | 0/4/4  | -      | -        | -               | -        | -              | -      | 0/6/6           |
| <b>Mikulov</b>     | -           | 0/1/1  | -      | -        | -               | -        | <b>2/12/12</b> | 0/1/1  | <b>2/14/14</b>  |
| Neveklov           | -           | -      | -      | 0/1/3    | 0/7/23          | -        | -              | -      | 0/8/26          |
| Nové Strašecí      | -           | -      | -      | -        | -               | 0/1/2    | -              | -      | 0/1/2           |
| Obecnice           | 0/3/3       | 0/2/2  | 0/1/1  | -        | -               | -        | -              | -      | 0/6/6           |
| Planá              | -           | -      | -      | -        | 0/6/27          | -        | -              | -      | 0/6/27          |
| Skalka             | -           | -      | -      | 0/1/1    | 0/3/7           | -        | -              | -      | 0/4/8           |
| Vonoklasy          | -           | -      | -      | 0/1/1    | -               | -        | -              | -      | 0/1/1           |
| <b>Total</b>       | 0/7/7       | 0/8/12 | 0/1/1  | 0/11/13  | <b>1/53/200</b> | 0/1/2    | <b>2/12/12</b> | 0/1/1  | <b>3/94/248</b> |
